# Supplementary material for: Ice Nucleation Activity and Aeolian Dispersal Success in Airborne and Aquatic Microalgae
Source: PubMed Central journal article supplement (PMC6240693; doi:10.3389/fmicb.2018.02681), 2018-11-12
Supplement: Table_1.pdf [file Table_1.pdf]

1 Table S1. Information on aquatic strains is presented: taxonomy at species level, sampling location  
 2 (origin), the location on Figure 1 (#), culture medium (freshwater: MWC, brackish-water: f2 25%,  
 3 sea-water: f2 100%), growth temperature (T) and the capacity of revival assessed over four months  
 4 after freezing (Revival).

| Strain      | Phylum          | Species                                  | Origin                                   | #  | Medium | T [°C] | Revival |
|-------------|-----------------|------------------------------------------|------------------------------------------|----|--------|--------|---------|
| Cryptomonas | Cryptophytes    | <i>Cryptomonas</i><br><i>sp.</i>         | Lake Highway,<br>Antarctica <sup>A</sup> | 1  | F2 25% | 4      | no      |
| GS1103-12   | Raphidophytes   | <i>Gonyostomum</i><br><i>semen</i>       | Minnesota,<br>USA <sup>B</sup>           | 3  | MWC    | 20     | no      |
| GSDA-04     | Raphidophytes   | <i>Gonyostomum</i><br><i>semen</i>       | Dagstorpssjön,<br>Sweden <sup>C</sup>    | 13 | MWC    | 20     | no      |
| GSJE-09     | Raphidophytes   | <i>Gonyostomum</i><br><i>semen</i>       | Jelino, Poland <sup>D</sup>              | 7  | MWC    | 20     | no      |
| GSNO-10     | Raphidophytes   | <i>Gonyostomum</i><br><i>semen</i>       | Nobleboro,<br>USA <sup>E</sup>           | 4  | MWC    | 20     | no      |
| GSNO-12     | Raphidophytes   | <i>Gonyostomum</i><br><i>semen</i>       | Nobleboro,<br>USA <sup>E</sup>           | 4  | MWC    | 20     | no      |
| GSNO-18     | Raphidophytes   | <i>Gonyostomum</i><br><i>semen</i>       | Nobleboro,<br>USA <sup>E</sup>           | 4  | MWC    | 20     | no      |
| GSNO-28     | Raphidophytes   | <i>Gonyostomum</i><br><i>semen</i>       | Nobleboro,<br>USA <sup>E</sup>           | 4  | MWC    | 20     | no      |
| GSNO-35     | Raphidophytes   | <i>Gonyostomum</i><br><i>semen</i>       | Nobleboro,<br>USA <sup>E</sup>           | 4  | MWC    | 20     | no      |
| GSPA-08     | Raphidophytes   | <i>Gonyostomum</i><br><i>semen</i>       | Pabzdinkai,<br>Lithuania <sup>F</sup>    | 8  | MWC    | 20     | no      |
| GSPA-23     | Raphidophytes   | <i>Gonyostomum</i><br><i>semen</i>       | Pabzdinkai,<br>Lithuania <sup>F</sup>    | 8  | MWC    | 20     | no      |
| PABR-04     | Dinoflagellates | <i>Peridinium</i><br><i>aciculiferum</i> | Brodammen,<br>Sweden <sup>G</sup>        | 10 | MWC    | 4      | yes     |
| PABR-05     | Dinoflagellates | <i>Peridinium</i><br><i>aciculiferum</i> | Brodammen,<br>Sweden <sup>G</sup>        | 10 | MWC    | 4      | no      |
| PACO-11     | Dinoflagellates | <i>Peridinium</i><br><i>aciculiferum</i> | Copenhagen,<br>Denmark <sup>A</sup>      | 9  | MWC    | 4      | yes     |
| PAER-01     | Dinoflagellates | <i>Peridinium</i><br><i>aciculiferum</i> | Lake Erken,<br>Sweden <sup>G</sup>       | 14 | MWC    | 4      | no      |
| PAER-02     | Dinoflagellates | <i>Peridinium</i><br><i>aciculiferum</i> | Lake Erken,<br>Sweden <sup>G</sup>       | 14 | MWC    | 4      | no      |
| PAER-03     | Dinoflagellates | <i>Peridinium</i><br><i>aciculiferum</i> | Lake Erken,<br>Sweden <sup>G</sup>       | 14 | MWC    | 4      | no      |

<sup>A</sup> Rengefors laboratory, <sup>B</sup> Lebre *et al.*, 2015, <sup>C</sup> Johansson *et al.*, 2016, <sup>D</sup> Pęczuła, Poniewozik & Szczurowska 2013, <sup>E</sup> isolated by Rengefors K, <sup>F</sup> Karosienė *et al.*, 2016, <sup>G</sup> Logares *et al.*, 2009, <sup>H</sup> isolated by Logares R, <sup>I</sup> isolated by Björnerås C, <sup>J</sup> Rengefors, Logares & Laybourn-Parry 2012, <sup>K</sup> isolated by Kremp A. *Apocalathium malmogiense* previously referred as *Scrippsiella hangoei* (Craveiro *et al.*, 2016).

## Ice nucleation active microalgae

|             |                 |                                 |                                        |    |         |    |     |
|-------------|-----------------|---------------------------------|----------------------------------------|----|---------|----|-----|
| PAER-08     | Dinoflagellates | <i>Peridinium aciculiferum</i>  | Lake Erken, Sweden <sup>G</sup>        | 14 | MWC     | 4  | no  |
| PASP-01     | Dinoflagellates | <i>Peridinium aciculiferum</i>  | Stora Pildammen, Sweden <sup>G</sup>   | 11 | MWC     | 4  | no  |
| PASP-02     | Dinoflagellates | <i>Peridinium aciculiferum</i>  | Stora Pildammen, Sweden <sup>G</sup>   | 11 | MWC     | 4  | yes |
| PASP-03     | Dinoflagellates | <i>Peridinium aciculiferum</i>  | Stora Pildammen, Sweden <sup>G</sup>   | 11 | MWC     | 4  | yes |
| PASP-04     | Dinoflagellates | <i>Peridinium aciculiferum</i>  | Stora Pildammen, Sweden <sup>G</sup>   | 11 | MWC     | 4  | yes |
| PB2-202a    | Dinoflagellates | <i>Peridinium baicalense</i>    | Lake Baikal, Russia <sup>A</sup>       | 6  | MWC     | 4  | no  |
| PGAbrC      | Dinoflagellates | <i>Polarella glacialis</i>      | Lake Abraxas, Antarctica <sup>G</sup>  | 1  | F2 100% | 4  | no  |
| PGCCMP-1383 | Dinoflagellates | <i>Polarella glacialis</i>      | Ross Sea <sup>G</sup>                  | 2  | F2 100% | 4  | yes |
| PGCCMP-2088 | Dinoflagellates | <i>Polarella glacialis</i>      | Baffin Bay, Arctic <sup>G</sup>        | 5  | F2 100% | 4  | yes |
| PGWI        | Dinoflagellates | <i>Polarella glacialis</i>      | Lake Williams, Antarctica <sup>H</sup> | 1  | F2 100% | 4  | no  |
| S3-188      | Cyanobacteria   | <i>Microcystis sp.</i>          | Lake Vombsjön, Sweden <sup>I</sup>     | 12 | MWC     | 20 | no  |
| S4-16       | Cyanobacteria   | <i>Microcystis sp.</i>          | Lake Vombsjön, Sweden <sup>I</sup>     | 12 | MWC     | 20 | no  |
| SHAB-T35    | Dinoflagellates | <i>Apocalathium malmogiense</i> | Lake Abraxas, Antarctica <sup>J</sup>  | 1  | F2 25%  | 4  | yes |
| SHLL-07     | Dinoflagellates | <i>Apocalathium malmogiense</i> | Östersjön, Finland <sup>K</sup>        | 15 | F2 25%  | 4  | yes |
| SHVE-74     | Dinoflagellates | <i>Apocalathium malmogiense</i> | Lake Vereteno, Antarctica <sup>J</sup> | 1  | F2 25%  | 4  | yes |

5

6

7

8

9

10

## 11 References

- 12 Craveiro, S.C., Daugbjerg, N., Moestrup, O. and Calado, A.J. (2016) Studies on *Peridinium*  
13 *aciculiferum* and *Peridinium malmogiense* (=Scrippsiella hangoei): comparison with *Chimonodinium*  
14 *lomnickii* and description of *Apocalathium gen. nov.* (Dinophyceae). *Phycologia* 56, 21-35. doi:  
15 10.2216/16-20.1
- 16 Johansson, K.S., Luhrig, K., Klaminder, J. and Rengefors, K. (2016) Development of a quantitative  
17 PCR method to explore the historical occurrence of a nuisance microalga under expansion. *Harmful*  
18 *Algae* 56, 67-76. doi: 10.1016/j.hal.2016.04.012
- 19 Karosienė, J., Kasperovičienė, J., Koreivienė, J., Savadova, K. and Vitonytė, I. (2016) Factors  
20 promoting persistence of the bloom-forming *Gonyostomum semen* in temperate lakes. *Limnologica*  
21 60, 51-58. doi: 10.1016/j.limno.2016.05.009
- 22 Lebret, K., Tesson, S.V.M., Kritzberg, E.S., Tomas, C. and Rengefors, K. (2015) Phylogeography of  
23 the freshwater raphidophyte *Gonyostomum semen* confirms a recent expansion in northern Europe by  
24 a single haplotype. *J. Phycol.* 51, 768-781. doi: 10.1111/jpy.12317
- 25 Logares, R., Boltovskoy, A., Bensch, S., Laybourn-Parry, J. and Rengefors, K. (2009) Genetic  
26 diversity patterns in five protist species occurring in lakes. *Protist* 160, 301-317. doi:  
27 10.1016/j.protis.2008.10.004
- 28 Pęczuła, W., Poniewozik, M. and Szczurowska, A. (2013) *Gonyostomum semen*(Ehr.) Diesing  
29 bloom formation in nine lakes of Polesie region (Central–Eastern Poland). *Ann. Limnol. - Int. J. Lim.*  
30 49, 301-308. doi: 10.1051/limn/2013059
- 31 Rengefors, K., Logares, R. and Laybourn-Parry, J. (2012) Polar lakes may act as ecological islands to  
32 aquatic protists. *Mol. Ecol.* 21, 3200-3209. doi: 10.1111/j.1365-294X.2012.05596.x  
33
