# Supplementary material for: Ice Nucleation Activity and Aeolian Dispersal Success in Airborne and Aquatic Microalgae
Source: PubMed Central journal article supplement (PMC6240693; doi:10.3389/fmicb.2018.02681), 2018-11-12
Supplement: Table_2.pdf [file Table_2.pdf]

1 Table S2. Information on airborne strains.  
2

| Strain    | Phylum-Class <sup>A</sup>    | Order-Species <sup>A</sup>                 | Amplicons <sup>B</sup> | Medium <sup>C</sup> | Revival <sup>D</sup> | Accession Number <sup>E</sup> |
|-----------|------------------------------|--------------------------------------------|------------------------|---------------------|----------------------|-------------------------------|
| S1F4-04   | Unknown algae                | -                                          | not amplified          | F2 25%              | NA                   | NA                            |
| S1F4-23   | Unknown algae                | -                                          | not amplified          | F2 25%              | NA                   | NA                            |
| S1MWC-04  | Chlorophyta-Trebouxiophyceae | <i>Prasiolales-Stichococcus bacillaris</i> | ITS(727)               | MWC                 | NA                   | MK005063                      |
| S1MWC-08  | Chlorophyta-Trebouxiophyceae | -                                          | ITS(609),18S(620)      | MWC                 | NA                   | MK005064, MK005120            |
| S1MWC-09  | Chlorophyta-Trebouxiophyceae | <i>Prasiolales</i>                         | ITS(734)               | MWC                 | NA                   | MK005065                      |
| S1MWC-10  | Chlorophyta-Trebouxiophyceae | <i>Trebouxiales-Trebouxia sp</i>           | 18S(346)               | MWC                 | NA                   | MK005121                      |
| S2CENT-36 | Chlorophyta-Trebouxiophyceae | <i>Trebouxiales-Trebouxia sp</i>           | ITS(847)               | MWC                 | yes                  | MK005066                      |
| S2CENT-37 | Chlorophyta-Chlorophyceae    | <i>Sphaeropleales-Neocystis mucosa</i>     | ITS(207)               | MWC                 | NA                   | MK005067                      |
| S2CENT-38 | Chlorophyta-Chlorophyceae    | <i>Sphaeropleales-Neocystis mucosa</i>     | ITS(682)               | MWC                 | NA                   | MK005068                      |
| S2CENT-44 | Chlorophyta-Trebouxiophyceae | <i>Prasiolales-Desmococcus olivaceus</i>   | ITS(735)               | MWC                 | NA                   | MK005069                      |
| S2CENT-45 | Chlorophyta-Trebouxiophyceae | <i>Trebouxiales-Trebouxia sp</i>           | ITS(797)               | MWC                 | yes                  | MK005070                      |
| S2CENT-56 | Chlorophyta-Chlorophyceae    | <i>Sphaeropleales-Neocystis sp</i>         | ITS(660)               | MWC                 | NA                   | MK005071                      |
| S2CENT-57 | Unknown algae                | -                                          | not amplified          | MWC                 | NA                   | NA                            |
| S2CENT-59 | Chlorophyta-Chlorophyceae    | <i>Sphaeropleales-Neocystis sp</i>         | ITS(671)               | MWC                 | NA                   | MK005072                      |
| S2CENT-61 | Unknown algae                | -                                          | not amplified          | MWC                 | NA                   | NA                            |
| S2CENT-62 | Unknown algae                | -                                          | not amplified          | MWC                 | NA                   | NA                            |
| S2F4-01   | Unknown algae                | -                                          | not amplified          | F2 25%              | yes                  | NA                            |

<sup>A</sup> The taxonomy is presented at the Phylum-Class-Order-Species level when available.

<sup>B</sup> As genetic markers we used partial 23S plastid gene, 18S and/or ITS rDNA genes and the amplicon length is indicated in brackets [bp]. Not amplified indicates that none of the genetic markers could be amplified despite an efficient DNA extraction.

<sup>C</sup> The culture medium was either artificial rain water (ARW), freshwater (MWC) or brackish-water (F2 25%).

<sup>D</sup> The capacity of revival was assessed over 31 weeks after freezing.

<sup>E</sup> NA stands for not available data.

## Ice nucleation active microalgae

|          |                                  |                                                     |                       |        |     |                       |
|----------|----------------------------------|-----------------------------------------------------|-----------------------|--------|-----|-----------------------|
| S2F4-03  | Chlorophyta-<br>Trebouxiophyceae | <i>Prasiolales-<br/>Stichococcus<br/>sp</i>         | ITS(627)              | F2 25% | yes | MK005073              |
| S2F4-12  | Unknown algae                    | -                                                   | 23S(332)              | F2 25% | yes | MK005104              |
| S2F4-15  | Unknown algae                    | -                                                   | not amplified         | F2 25% | NA  | NA                    |
| S2F4-16  | Stramenopiles-<br>Xanthophyceae  | <i>Tribonematale<br/>s-Tribonema<br/>affine</i>     | 23S(409)              | F2 25% | NA  | MK005105              |
| S2F4-19  | Chlorophyta-<br>Trebouxiophyceae | <i>Prasiolales-<br/>Desmococcus<br/>spinocystis</i> | ITS(570)              | F2 25% | NA  | MK005074              |
| S2F4-21  | Unknown algae                    | -                                                   | not amplified         | F2 25% | NA  | NA                    |
| S2F4-24  | Stramenopiles-<br>Xanthophyceae  | <i>Tribonematale<br/>s-Tribonema<br/>affine</i>     | 23S(402)              | F2 25% | NA  | MK005106              |
| S2F4-25  | Chlorophyta-<br>Trebouxiophyceae | <i>Prasiolales-<br/>Desmococcus<br/>olivaceus</i>   | ITS(760)              | F2 25% | yes | MK005075              |
| S2MWC-02 | Chlorophyta-<br>Trebouxiophyceae | <i>Chlorellales-<br/>Apatococcus<br/>sp</i>         | ITS(752)              | MWC    | yes | MK005076              |
| S2MWC-05 | Chlorophyta-<br>Trebouxiophyceae | <i>Chlorellales-<br/>Pseudochlorell<br/>a sp</i>    | ITS(634)              | MWC    | NA  | MK005077              |
| S2MWC-06 | Chlorophyta-<br>Trebouxiophyceae | <i>Chlorellales-<br/>Pseudochlorell<br/>a sp</i>    | ITS(633)              | MWC    | NA  | MK005078              |
| S2MWC-07 | Unknown algae                    | -                                                   | not amplified         | MWC    | NA  | NA                    |
| S2MWC-09 | Chlorophyta-<br>Trebouxiophyceae | <i>Prasiolales</i>                                  | ITS(684)              | MWC    | NA  | MK005079              |
| S2MWC-11 | Chlorophyta-<br>Trebouxiophyceae | -                                                   | ITS(620),18S<br>(603) | MWC    | yes | MK005080,<br>MK005122 |
| S2MWC-12 | Chlorophyta-<br>Trebouxiophyceae | <i>Prasiolales</i>                                  | ITS(562),18S<br>(394) | MWC    | NA  | MK005081,<br>MK005123 |
| S2MWC-13 | Chlorophyta-<br>Trebouxiophyceae | <i>Prasiolales-<br/>Desmococcus<br/>olivaceus</i>   | ITS(756)              | MWC    | NA  | MK005082              |
| S2MWC-15 | Chlorophyta-<br>Trebouxiophyceae | -                                                   | ITS(633),18S<br>(618) | MWC    | yes | MK005083,<br>MK005124 |
| S2MWC-16 | Chlorophyta-<br>Trebouxiophyceae | -                                                   | 18S(421)              | MWC    | yes | MK005125              |
| S2RA-18  | Chlorophyta-<br>Trebouxiophyceae | <i>Prasiolales-<br/>Stichococcus<br/>bacillaris</i> | ITS(422)              | ARW    | yes | MK005084              |
| S2RA-21  | Chlorophyta-<br>Trebouxiophyceae | <i>Prasiolales-<br/>Stichococcus<br/>sp</i>         | ITS(688)              | ARW    | NA  | MK005085              |

|          |                                  |                                                             |                                     |        |     |                                    |
|----------|----------------------------------|-------------------------------------------------------------|-------------------------------------|--------|-----|------------------------------------|
| S2RA-30  | Chlorophyta-<br>Trebouxiophyceae | <i>Prasiolales-<br/>Desmococcus<br/>olivaceus</i>           | ITS(756)                            | ARW    | yes | MK005086                           |
| S2RM-15  | Chlorophyta-<br>Trebouxiophyceae | <i>Trebouxiales-<br/>Trebouxia<br/>decolorans</i>           | ITS(695)                            | MWC    | yes | MK005087                           |
| S2RM-16  | Chlorophyta-<br>Trebouxiophyceae | <i>Trebouxiales-<br/>Trebouxia<br/>decolorans</i>           | ITS(508),23S<br>(386),18S(15<br>41) | MWC    | yes | MK005088,<br>MK005107,<br>MK005126 |
| S2RM-18  | Chlorophyta-<br>Trebouxiophyceae | <i>Trebouxiales-<br/>Trebouxia<br/>decolorans</i>           | 23S(410)                            | MWC    | yes | MK005108                           |
| S2RM-20  | Chlorophyta-<br>Trebouxiophyceae | -                                                           | 23S(407)                            | MWC    | yes | MK005109                           |
| S2RM-21  | Chlorophyta-<br>Trebouxiophyceae | <i>Prasiolales-<br/>Desmococcus<br/>olivaceus</i>           | ITS(762)                            | MWC    | yes | MK005089                           |
| S2RM-23  | Chlorophyta-<br>Trebouxiophyceae | <i>Prasiolales-<br/>Desmococcus<br/>olivaceus</i>           | ITS(634)                            | MWC    | yes | MK005090                           |
| S2RM-26  | Chlorophyta-<br>Trebouxiophyceae | <i>Prasiolales</i>                                          | ITS(660)                            | MWC    | yes | MK005091                           |
| S2RM-28  | Chlorophyta-<br>Trebouxiophyceae | <i>Prasiolales-<br/>Desmococcus<br/>olivaceus</i>           | ITS(763)                            | MWC    | yes | MK005092                           |
| S3F4-32  | Chlorophyta-<br>Trebouxiophyceae | <i>Prasiolales-<br/>Desmococcus<br/>olivaceus</i>           | ITS(675)                            | F2 25% | NA  | MK005093                           |
| S3F4-36  | Unknown algae                    | -                                                           | not amplified                       | F2 25% | NA  | NA                                 |
| S3F4-37  | Unknown algae                    | -                                                           | not amplified                       | F2 25% | NA  | NA                                 |
| S3F4-39  | Unknown algae                    | -                                                           | not amplified                       | F2 25% | NA  | NA                                 |
| S3F4-46  | Chlorophyta-<br>Trebouxiophyceae | <i>Trebouxiales-<br/>Trebouxia sp</i>                       | ITS(723)                            | F2 25% | yes | MK005094                           |
| S3F4-50  | Unknown algae                    | -                                                           | not amplified                       | F2 25% | NA  | NA                                 |
| S3F4-61  | Chlorophyta-<br>Trebouxiophyceae | <i>Chlorellales-<br/>Apatococcus<br/>sp</i>                 | 23S(405)                            | F2 25% | NA  | MK005110                           |
| S3F4-64  | Unknown algae                    | -                                                           | not amplified                       | F2 25% | yes | NA                                 |
| S3F4-66  | Chlorophyta-<br>Trebouxiophyceae | <i>Prasiolales-<br/>Desmococcus<br/>olivaceus</i>           | ITS(762)                            | F2 25% | yes | MK005095                           |
| S3MWC-21 | Chlorophyta-<br>Chlorophyceae    | <i>Chlamydomon<br/>ales-<br/>Tetracystis vin<br/>atzeri</i> | ITS(608)                            | MWC    | yes | MK005096                           |
| S3MWC-29 | Chlorophyta-<br>Chlorophyceae    | <i>Chlamydomon<br/>ales-</i>                                | ITS(609)                            | MWC    | yes | MK005097                           |

## Ice nucleation active microalgae

|            |                              | <i>Tetracystis vin atzeri</i>                              |               |     |     |          |
|------------|------------------------------|------------------------------------------------------------|---------------|-----|-----|----------|
| S3R-01     | Chlorophyta-Trebouxiophyceae | <i>Trebouxiophyceae ordo incertae sedis-Coccomyxa sp</i>   | ITS(68)       | ARW | yes | MK005098 |
| S3R-02     | Unknown algae                | -                                                          | not amplified | ARW | yes | NA       |
| S3R-11     | Chlorophyta-Trebouxiophyceae | <i>Prasiolales-Desmococcus olivaceus</i>                   | ITS(496)      | ARW | NA  | MK005099 |
| S4MWC-01   | Unknown algae                | -                                                          | not amplified | MWC | NA  |          |
| S4MWC-02   | Stramenopiles-Xanthophyceae  | -                                                          | 23S(409)      | MWC | NA  | MK005111 |
| S4MWC-07   | Unknown algae                | -                                                          | not amplified | MWC | NA  |          |
| S4MWC-10   | Stramenopiles-Xanthophyceae  | -                                                          | 23S(409)      | MWC | NA  | MK005112 |
| S4MWC-13   | Chlorophyta-Trebouxiophyceae | <i>Trebouxiales-Trebouxia sp</i>                           | ITS(662)      | MWC | yes | MK005100 |
| S4MWC-17   | Chlorophyta-Trebouxiophyceae | <i>Trebouxiales-Trebouxia impressa</i>                     | ITS(124)      | MWC | yes | MK005101 |
| S4MWC-18   | Stramenopiles-Xanthophyceae  | -                                                          | 23S(409)      | MWC | NA  | MK005113 |
| S4MWC-25   | Chlorophyta-Trebouxiophyceae | <i>Trebouxiales-Trebouxia sp</i>                           | ITS(664)      | MWC | yes | MK005102 |
| S4MWC-45   | Stramenopiles-Xanthophyceae  | -                                                          | 23S(322)      | MWC | yes | MK005114 |
| S4MWC-47   | Stramenopiles-Xanthophyceae  | -                                                          | 23S(311)      | MWC | yes | MK005115 |
| S4MWC-51   | Chlorophyta-Trebouxiophyceae | <i>Trebouxiophyceae ordo incertae sedis-Chloroidium sp</i> | ITS(578)      | MWC | NA  | MK005103 |
| S5CAR-W-04 | Stramenopiles-Xanthophyceae  | <i>Tribonematales-Tribonema sp</i>                         | 23S(409)      | ARW | NA  | MK005116 |
| S5CAR-W-05 | Stramenopiles-Xanthophyceae  | <i>Tribonematales-Tribonema sp</i>                         | 23S(409)      | ARW | NA  | MK005117 |
| S5CAR-W-06 | Stramenopiles-Xanthophyceae  | <i>Tribonematales-Tribonema sp</i>                         | 23S(409)      | ARW | NA  | MK005118 |
| S5MWC-02   | Unknown algae                | -                                                          | not amplified | MWC | yes | NA       |
| S5MWC      | Unknown algae                | -                                                          | not amplified | MWC | NA  | NA       |

|     |       |                |   |               |     |     |          |
|-----|-------|----------------|---|---------------|-----|-----|----------|
| -22 | S5MWC | Unknown algae  | - | not amplified | MWC | yes | NA       |
| -23 | S5MWC | Stramenopiles- | - | 23S(409)      | MWC | yes | MK005119 |
| -52 |       | Xanthophyceae  |   |               |     |     |          |
| -56 | S5MWC | Unknown algae  | - | not amplified | MWC | yes | NA       |
| -58 | S5MWC | Unknown algae  | - | not amplified | MWC | yes | NA       |
| -65 | S5MWC | Unknown algae  | - | not amplified | MWC | yes | NA       |

3
