# Supplementary material for: Ice Nucleation Activity and Aeolian Dispersal Success in Airborne and Aquatic Microalgae
Source: PubMed Central journal article supplement (PMC6240693; doi:10.3389/fmicb.2018.02681), 2018-11-12
Supplement: Table_3.pdf [file Table_3.pdf]

1 Table S3. Mean ice nuclei produced per cell for each category of temperature tested in strains of  
 2 airborne and aquatic microalgae. NA stands for not available data because all wells were already  
 3 frozen.

| Strain      | [0°;-6°C[ | [-6°;-12°C[ | [-12°;-18°C[ | [-18°;-24°C[ | [-24°;-30°C[ | Origin   | Condition  |
|-------------|-----------|-------------|--------------|--------------|--------------|----------|------------|
| S2F4-16     | 0.0000000 | 0.0000000   | 0.0000419    | 0.0971919    | 0.1282321    | Airborne | non-axenic |
| S2RA-18     | 0.0000000 | 0.0000665   | 0.0003689    | 0.0019943    | 0.0049324    | Airborne | non-axenic |
| S2RA-30     | 0.0000101 | 0.0008118   | 0.0857436    | 0.1745291    | 0.6185547    | Airborne | non-axenic |
| S2RM-15     | 0.0000000 | 0.0019988   | 0.0181928    | 0.0361567    | 0.1494898    | Airborne | non-axenic |
| S2RM-16     | 0.0038919 | 0.1537032   | 0.3077384    | NA           | NA           | Airborne | non-axenic |
| S2RM-18     | 0.0061103 | 0.0380051   | 0.2451492    | 0.4094487    | 0.6011755    | Airborne | non-axenic |
| S2RM-20     | 0.0004747 | 0.0008024   | 0.0023561    | 0.0050443    | 0.0068231    | Airborne | non-axenic |
| S2RM-21     | 0.0020118 | 0.0054712   | 0.0147783    | 0.0406992    | 0.1439558    | Airborne | non-axenic |
| S2RM-23     | 0.0001666 | 0.0024406   | 0.0122867    | 0.0196703    | NA           | Airborne | non-axenic |
| S2RM-26     | 0.0000627 | 0.0001834   | 0.0007331    | 0.0013159    | 0.0035653    | Airborne | non-axenic |
| S2RM-28     | 0.0000119 | 0.0003828   | 0.0022807    | 0.0170734    | 0.1703241    | Airborne | non-axenic |
| S3MWC-21    | 0.0000000 | 0.0000000   | 0.0013787    | 0.0254251    | 0.0391052    | Airborne | non-axenic |
| S3MWC-29    | 0.0000000 | 0.0000000   | 0.0052935    | 0.0241139    | NA           | Airborne | non-axenic |
| S5MWC-23    | 0.0000000 | 0.0023123   | 0.0504848    | 0.0922745    | 0.1508952    | Airborne | non-axenic |
| GS1103-12   | 0.0000000 | 0.0000000   | 0.4972322    | 0.6707031    | 3.5215115    | Aquatic  | non-axenic |
| GSDA-04     | 0.0000000 | 0.0000000   | 0.0080694    | 0.1221817    | 0.2851870    | Aquatic  | non-axenic |
| GSJE-09     | 0.0000000 | 0.0000000   | 0.0147091    | 1.2860438    | 0.9441319    | Aquatic  | non-axenic |
| GSPA-08     | 0.0000000 | 0.0000000   | 0.1307291    | 0.4614394    | 0.5644133    | Aquatic  | non-axenic |
| PABR-04     | 0.0000000 | 0.0000000   | 0.0179144    | 0.0322819    | 0.1339625    | Aquatic  | non-axenic |
| PACO-11     | 0.0000000 | 0.0000000   | 0.1189971    | 0.2565323    | 0.4742750    | Aquatic  | non-axenic |
| PAER-01     | 0.0000000 | 0.0000000   | 0.0841104    | 0.4900608    | 0.8823974    | Aquatic  | non-axenic |
| PASP-01     | 0.0000000 | 0.0000000   | 0.2429015    | 0.4581724    | 0.6956299    | Aquatic  | non-axenic |
| PASP-02     | 0.0000000 | 0.0000000   | 0.0000000    | 0.0966947    | 1.9669535    | Aquatic  | non-axenic |
| PASP-03     | 0.0000000 | 0.0000000   | 0.0075797    | 0.2141758    | 2.6787606    | Aquatic  | non-axenic |
| PASP-04     | 0.0000000 | 0.0001268   | 0.0175091    | 0.3521643    | 1.9737546    | Aquatic  | non-axenic |
| PGCCMP-1383 | 0.0000000 | 0.0000190   | 0.0036487    | 0.0345705    | 0.1404170    | Aquatic  | non-axenic |
| PGCCMP-2088 | 0.0000000 | 0.0000000   | 0.0387615    | 0.0930952    | 0.1934315    | Aquatic  | non-axenic |
| S3-188      | 0.0000000 | 0.0000000   | 0.0000000    | 0.0022292    | 0.0302583    | Aquatic  | non-axenic |
| SHAB        | 0.0000000 | 0.0000000   | 0.0802984    | 0.3963486    | 2.5440753    | Aquatic  | non-axenic |
| SHVE        | 0.0000000 | 0.0000000   | 0.0037146    | 0.2211920    | 0.3336112    | Aquatic  | non-axenic |
| PASP-03     | 0.0000000 | 0.0000000   | 0.0365990    | 0.0015928    | NA           | Aquatic  | axenic     |
| PASP-04     | 0.0000000 | 0.0000000   | 0.0068043    | 0.0031319    | NA           | Aquatic  | axenic     |
| PGCCMP-1383 | 0.0000000 | 0.0000000   | 0.0225206    | 0.0038930    | NA           | Aquatic  | axenic     |
